## A SURPRISING FORMULA FOR THE SPREAD OF COVID-19 UNDER AGGRESSIVE MANAGEMENT

IVAN CHEREDNIK <sup>†</sup>

**ABSTRACT.** We propose an algebraic-type formula that describes with high accuracy the total number of detected infections for the Covid-19 pandemic in many countries. Our 2-phase formula can be used as a powerful forecasting tool. It is based on a new theory of momentum management of epidemics; Bessel functions are employed. Its parameters are the initial transmission rate, reflecting the viral fitness and "normal" frequency of contacts in the infected areas, and the intensity of prevention measures. Austria, Germany, Japan, Israel, Italy, the Netherlands, Sweden, Switzerland, UK, and the USA are considered. As for the latter, we provide the results of auto-processing individually the data for the 50 states.

**1. Our approach and main findings.** A surprising *2-phase formula* describing very well the total number of detected infections of *Covid-19* during practically the whole period of the spread in many countries is the main result. We model the *momentum management of epidemics*, which can be defined as a system of measures of any nature aimed at reducing the epidemic spread by regulating the intensity of these measures on the basis of the latest total detected numbers of infections. The "hard measures", such as detection and prompt isolation of infected people and closing the places where the spread is the most likely, combined with the most aggressive response ensure a relatively fast saturation. Assuming that the saturation is reached, the second phase is when the hard measures are reduced. The accuracy of our formula is even more surprising for this phase, since many political, economic and other factor are involved. The readers mostly interested in the final formulas and applications in particular countries can go directly to the figures from Section 5. Our approach is of behavioral and sociological nature; its precision seems a real discovery.

**Focus on risk-management.** We attribute the surprising similarity of the curves of the *total numbers of detected cases* in many countries

---

<sup>†</sup> Department of Mathematics, UNC Chapel Hill, NC, USA.  
Email: [chered@email.unc.edu](mailto:chered@email.unc.edu) .

to the uniformity of the measures employed and the ways we react to the data. These numbers mostly reflect *symptomatic cases* and can be underreported. However, as far as they influence the decisions of the authorities in charge and our own behavior, they can be used.

We see 3 basic types of management. The countries in the first group are determined to reach "double digit numbers" of new daily infections. The second group is when the reduction of hard measures begins upon the first signs of the stabilization of the daily numbers, which can be still very high; this is the switch to the  $(AB)$ -mode or  $(B)$ -mode in our model. The third group of countries is where "hard" measures are not employed systematically, which can be due to a variety of reasons, including insufficient capacities or political decisions. Some measures are always in place, for instance, self-isolation of those who think that they can be infected. Their prompt requests for medical help can work well in the countries with solid health-care systems, like Sweden. Also, travel restrictions, common everywhere, definitely reduce the spread.

The general theory remains essentially unchanged from its first posted variant (April 13). However only now *all* its main features are confirmed to occur practically. For instance, *both* Bessel-type solutions appeared really necessary to model the spread in Italy, Germany, Japan and other countries. Also, the  $\log(t)$ -saturation of solutions of type  $(B)$  appeared the key during the second phase.

**Power law of epidemics.** The simplest equation for the spread of communicable diseases results in exponential growth of the number of infections, which is mostly applicable to the initial stages of epidemics. See e.g. [1, 2, 3, 4] here and below and [5] about some perspectives with *Covid-19*. We focus on the middle stages, where the growth is no greater than some power functions in time, which requires a different approach and different equations.

The equally classical *logistic* models of the spread, as well as the SIR, SID generalizations, assume that the number of infections is comparable with the whole population, which we do not impose. Many epidemics were not really of this kind during the last 100 years, mostly due to better disease control worldwide and general life improvements.

The reality now is the power-type growth of *total* number of infections  $U(t)$  after a possible short period of exponential growth, *Covid-19* included. Our approach is based on this assumption.

Generally,  $dU(t)/dt$ , the rate of change of the total number of infections  $U(t)$  is proportional to  $U(t) - U(t-p)$ , where  $p$  is the period when the infected people spread the virus in the most intensive way. Assuming that  $U(t) = t^\alpha$ , one has:  $dU(t)/dt = \alpha t^{\alpha-1}$  and the leading term of  $U(t) - U(t-p)$  is  $p \alpha t^{\alpha-1} = p \alpha U(t)/t$ , i.e. essentially proportional to  $dU(t)/dt$ . However, if  $\alpha > 1$ , there will be other terms in the

expansion of  $U(t) - U(t-p)$  and the proportionality with  $U(t)/t$  can be only if either the virus transmission strength diminishes or we reduce our contacts over time. We stick to the latter reason in this work.

Let us try to clarify this. If the total number of cases grows linearly, i.e. when the number of new daily infections is constant, this is not really a "trigger" for us psychologically. However, we react strongly if the growth is parabolic or so. With *Covid-19*, *sociological* factors alone seem quite sufficient to result in the power growth. This is different from other power laws for infectious diseases; compare e.g. with [3].

Practically speaking, if someone wants to "see" the current *trend* of the epidemic using *only* the total number of infections to date, then  $U(t)/t$  is the best way of course. Anyway, the corresponding differential equation  $dU(t)/dt = cU(t)/t$  immediately gives that  $U(t) = Ct^c$  for some constant  $C$ , i.e. results in the power growth. Such "sociological approach" to the epidemic spread is quite natural in our work: the active managements of epidemics is clearly of sociological nature.

This is what we do even *before* any protection measures; the initial  $c$  is about 2 in many countries for *Covid-19*. After the management began,  $U(t)$  is not  $\sim t^c$  anymore; Bessel functions come into play till the "technical saturation", provided that the measures are as "hard" as possible. The measures can soften after the turning point, or what looks like a turning point. We can model this too; our formula describes the *second phase* with very high accuracy.

**Some details.** The full theory is presented in [6]. If the number of new infections is proportional to the current number of those infected, then the exponential growth of the spread is granted. By analogy with *news impact over time* from [7], it is quite likely that the number of such contacts is proportional to the current *total* number of the detected infections to date *divided by the time to date*. The coefficient of proportionality is the intensity of the spread. The "news impact" is absolutely relevant here: the discussion of the epidemic by the authorities in charge and everywhere is one of the key factors influencing our understanding the situation and the reduction of our contacts. The active prevention measures are the main factor, but they begin later.

Starting with the equation  $dU(t)/dt = cU(t)/t$  for the total number of infections  $U(t)$ , the coefficient of proportionality, the *basic transmission rate*  $c$ , is therefore a combination of the transmission strength of the virus and the "normal" frequency of the contacts in the infected place. There can be other mechanisms for the "power law", including the biological ones. Self-isolation of infected species is common ... unless for *rabies*; it can grow over time and can depend on the intensity of the spread. The replication processes for viruses is another reduction mechanism, but this is well beyond this article.

The coefficient  $c$  is one of the two main mathematical parameters of our theory. It can be qualitatively seen as follows.

Before the prevention measures are implemented, approximately it reveals itself in the growth  $\sim t^c$  of the total number of detected infections, where  $t$  is time. Mostly,  $c \approx 2.2 - 2.6$  for *Covid-19*. This is after a short period of the exponential growth. Upon the active management, the growth quickly drops to  $t^{c/2}$ , i.e. becomes essentially linear, which is part of our theory in [6]. Importantly our  $u(t)$  and  $w(t)$  behave as  $\sim t^c$  for relatively small  $t$ , so Bessel functions can be used very well to model the initial stages, not only the middle period.

**Ending epidemics.** The "power law" is only a starting point of our analysis. The main problem is of course to "add" here some mechanisms ending epidemics and those preventing their possible recurrence. These are major challenges, biologically, psychologically, sociologically and mathematically. One can expect this *megaproblem* to be well beyond the power law itself, but we demonstrate that mathematically there is a path based on Bessel functions. The power growth alone does not lead to any saturation, the Bessel functions are needed.

We are of course fully aware of the statistical nature of the problem, but the formula for the growth of the total number of infections we propose works almost with an accuracy of physics laws. This is very surprising for such stochastic processes as epidemics.

An important outcome of our modeling is that the measures of "hard type", like detecting and isolating infected people and closing the places where the spread is almost inevitable, are the key for ending an epidemic. The most aggressive "hard way" is to employ such measures strictly proportionally to the current total numbers of detected infections, not to its derivative of any kind.

For instance, if the number of infections doubles during some period, then *testing-detection* must be increased 4-fold. Similarly, when we approach the saturation, where the number of new detected infections becomes close to zero, the "hard response" is to continue testing *linearly* for some time, i.e. performing the same number of tests every day in spite of almost zero number of new infections.

By contrast, the "soft response" is as follows. We react to the *average* number instead of the *absolute* number of infections. For instance, testing and other measures will practically stop when there are no new "cases". If this is coupled with "soft" measures (see below), then mathematically the epidemic will never reach the saturation. However coupling the "soft response" with "hard" measures does result in the saturation, though it will take longer.

**The  $u, w$ -formulas.** Upon composing the corresponding differential equations and integrating them we obtain the following. The function  $u(t) = C t^{(c+1)/2} J_{c/2-1/2}(\sqrt{at})$  for the Bessel function  $J_\alpha(x)$  of the first kind models the growth of the *total* number of infections, where  $C$  is the scaling parameter. Here and below time  $t$  is normalized *days*/10 for the number of days from the beginning of the period of the intense growth of the epidemic. Under "soft response" it is  $w(t) = D t^{(c+1)/2} J_{c-1}(2\sqrt{bt})$  for the same  $c$  but different  $D, b$ . We will mostly discuss  $u(t)$ , which work with high accuracy till the late stages. Both are  $\sim t^c$  for small  $t$ . Thus both cover well the period of initial, essentially quadratic, growth of the number of detected infections. The parameters  $a, b$  give the *intensity* of "hard" measures correspondingly for  $u(t)$  and  $w(t)$ .

For the  $u$ -function,  $a$ , the intensity ( $A$ )-measures, is 0.2 for the USA, UK, Italy and the Netherlands. It is 0.3–0.35 for Israel, Austria, Japan, Germany; 0.1 for Sweden. The parameter  $c$ , the initial transmission rate, is 2.2 for the USA, 2.4 for UK, Austria, Sweden, the Netherlands, 2.6 for Italy, Germany, Japan. Here  $c$  can be clearly seen at early stages;  $a$  depends on the management, but it is stable and uniform during the middle stages in quite a few countries.

**Limitations.** Of course there can be other reasons for our *2-phase solution* to "serve" epidemics so well, not only due to the aggressive management. It is not impossible that there are connections with the replication process of viruses, but this we do not touch upon. As in any models, there are limitations, which we will address now.

First and foremost, the available infection numbers are for the *detected* cases, which are mostly *symptomatic*. However this is not of much concern to us. We understand managing epidemics from the viewpoint of the management. Infected people who are detected mostly have symptoms, but the change of the number of detected cases generally reflects well the "trend", which is sufficient to properly adjust the intensity of the measures. So *de facto* focusing on symptomatic cases is basically sufficient for the management (and for our approach). No assumptions on asymptomatic cases are necessary to obtain our formulas. We of course understand that when the number of new *reported* infections drops to zero, there can be many non-detected asymptomatic cases, which can potentially lead to the recurrence of the epidemic. Such a saturation is only a *technical* end of the epidemic.

The second reservation concerns *newly emerged clusters of infections*, testing in new areas, and the countries where the spread is on the rise. The  $u, w$ -formulas can be used, but significant fluctuations can be expected. Also the usage of *both* Bessel-type solutions of our equations appeared necessary to address the "bents" of the curves in

quite a few countries. Anyway, the parameters and predictions must be constantly updated.

The third reservation is related to the management of the epidemic. Not all countries employ the protection measures in similar ways, but this is not a problem to us. The problem is if the intensity of the measures and the criteria are changed in some irregular ways. Diminishing the "hard" measures too early or even dropping them completely at later stages is of this kind; this is where  $w(t)$  comes into play.

Last but not the least is the *data quality*. Changing frequently the ways they are collected and the criteria makes such data useless for us. Though, if the number of detected infections is underreported in some regular ways, whatever the reasons, such data can be generally used. Thus, this is sufficiently relaxed, but the data for several countries, not too many, are not suitable for the usage of our "forecasting tool".

**Forecasting the spread.** With these reservations, the first point of maximum  $t_{top}$  of  $u(t)$  is a good estimate for the duration of the epidemic when the "hard" measures are used and the response is "hard". If the response to total number of infections is "soft", the  $w$ -function is supposed to be used. This is assuming that the measures are systematic and the focus is on the detection and isolation of infected people.

We note that the approximate reflection symmetry of  $du(t)/dt$  for the  $u(t)$  in the range from  $t = 0$  to  $t_{top}$  can be interpreted as *Farr's law of epidemics under aggressive management*. Generally, the portions of the corresponding graph before and after the *turning point* are supposed to be essentially symmetric to each other. This is not exactly true for  $du(t)/dt$ , the first half is a bit shorter than the second. See Figure 2 and the others; the turning point is at  $\max\{du(t)/dt\}$ . For  $w(t)$ , the period after the turning point is somewhat longer than that before.

After the saturation is reached, the second phase begins. The formula is  $Ct^{c/2} \cos(d \log(t))$ , where  $t$  is time,  $d$  reflects the intensity of "soft" measures, and  $c$  is the initial transmission rate. Here  $c/2 \approx 1$ , so the number of new daily detected cases is essentially constant. If it is small enough, the spread can be controlled: new clusters of the disease can be then promptly detected, and so on. Also, asymptomatic (mild) cases begin to dominate at the second phase, which is a positive development too. Mathematically, the first phase based on "hard" measures is necessary for phase 2.

As any model, our one is based on various simplifications. We assume that the number of people perceptive to the virus is unlimited, i.e. we do not consider epidemics with the number infections comparable with the whole population. Also, we do not take into consideration the average durations of the disease the quarantine periods in our model. The *total* number of *detected* infections is what we are going to model,



which is commonly used and systematically reported. In spite of all these simplifications, our 2-phase formula works very well.

We mention here a strong connections with *behavioral finance: momentum risk-taking* from [7]. Practically the same  $u(t)$  as above serves "profit taking" in stock markets. The initial polynomial growth of  $u(t)$  is parallel to the "power law" for share prices;  $w(t)$  and our solution for the *phase 2* occurred there as well

**2. Two kinds of management.** There is a long history and many aspects of mathematical modeling epidemic spread; see e.g. [1] for a review. We restrict ourselves only with the dynamic of *momentum managing epidemics*, naturally mostly focusing on the middle stages, when our actions must be as precise as possible. The two basic modes we consider are essentially as follows:

(A) aggressive enforcement of the measures of immediate impact, where testing-detection-isolation is the key, reacting to the current *absolute* numbers of detected infections, i.e. in the hardest possible way;

(B) a more balanced and more defensive approach when mathematically we react to the *average* numbers of infections to date and the employed measures are of more indirect and palliative nature.

**Hard and soft measures.** The main examples of (A)-type measures are prompt detection and isolation of infected people and those of high risk to be infected, and closing places where the spread is the most likely. Actually the primary measure here is *testing*; the number of tests is what we can really implement and control. The *detection* of infected people is its main purpose, but the number of tests is obviously not directly related to the number of detections, i.e. to the number of *positive tests*. The efficiency of testing requires solid priorities, focus on the groups with main risks, and solving quite a few problems.

Even simple mentioning problems with testing, detection and isolation is well beyond our article. However, numerically we can use the following. During the epidemics, essentially during the stages of linear growth, which are the key for us, the number of positive tests can be mostly assumed a stable fraction of the total number of tests. This is demonstrated in Figure 1. Such proportionality can be seen approximately from March 16 in this figure.

The measures like wearing protective masks, social distancing, recommended self-isolation, restricting the size of events are typical for (B). They are aimed at reducing  $c$ , which heavily impacted the differential equations we obtained in [6]. However the main difference between the modes, (A) vs. (B), is the way the number of infections is treated: the *absolute* number of infections is the trigger for (A), whereas the *average* number of infections to date is what we monitor

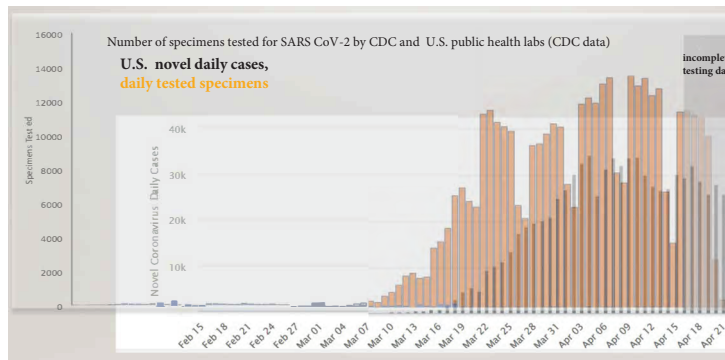

FIGURE 1. Daily testing vs. new daily cases for USA

under  $(B)$ . The mode  $(AB)$  from [6], a combination of "hard" measures with "soft response", is important at later stages of *Covid-19*.

**Hard measures are the key.** Generally, the  $(A)$ -type approach provides the fastest and hardest response to the changes with the number of infections. We somewhat postpone with our actions until the averages reach proper levels under  $(B)$ , and the measures we implement are "softer". Mathematically, the  $(B)$ -mode is better protected against stochastic fluctuations, but it is slower and generally cannot alone lead to the termination of the epidemic, which we justify within our approach.

The main objective of any managing epidemics is to end them quickly. However the excessive usage of hard measures can lead to the recurrence of the epidemic, some kind of "cost" of our aggressive interference in a natural process. Unless *herd immunity* is a possibility, this can be avoided only if we stick to the prevention measures as much as possible even when the number of new infections goes down significantly. Reducing them too much on the first signs of improvement is a way to the recurrence of the epidemic, which we can see mathematically.

**Some biological aspects.** The *viral fitness* is an obvious component of the transmission rate  $c$ . Its diminishing over time can be expected, but this is involved. This can happen because of the virus replication errors. The *RNA* viruses, *Covid-19* included, replicate with fidelity that is close to error catastrophe. See e.g. [8] for some review and predictions. Such matters are well beyond this paper, but one biological aspect must be mentioned, concerning the *asymptomatic cases*.

The viruses mutate at very high rates. They can "soften" over time to better coexist with the hosts, though fast and efficient spread is of course the "prime objective" of any virus. Such softening can result in an increase of asymptomatic cases, difficult to detect. So this can contribute to diminishing  $c$  we observe, though not because of the actual



decrease of the spread of the disease. We model the available (posted) numbers of total infections, which mostly reflect the symptomatic cases.

To summarize, it is not impossible that the replication errors and "softening the virus" may result in diminishing  $c$  at later stages of the epidemic, but we think that the reduction of the contacts of infected people with the others dominates here, which is directly linked to behavioral science, sociology and psychology.

**3. The Bessel-type formulas.** We will need the definition of the *Bessel functions* of the first kind:

$$J_{\alpha}(x) = \sum_{m=0}^{\infty} \frac{(-1)^m (x/2)^{2m+\alpha}}{m! \Gamma(m + \alpha + 1)}.$$

See [9] (Ch.3, S 3.1). Practically, use `BesselJ`[ $\alpha$ ,  $x$ ] in Mathematica.

The key point is that measures of type (A) have "ramified" consequences, in some contrast to (B). Namely, isolated infected individuals will *not* transmit the virus to many people, they will not infect many others and so on; thus the number of those protected due to a single isolation grows over time. Combining this with our approach to the power law of epidemics, we arrive at the differential equation for the total number of detected infections  $u(t), w(t)$ :

$$\frac{du(t)}{dt} = c \frac{u(t)}{t} - \frac{1}{a} \int_0^t u(s) ds, \quad \frac{dw(t)}{dt} = c \frac{w(t)}{t} - \frac{1}{b} \int_0^t \frac{w(s)}{s} ds,$$

which can be solved in terms of Bessel functions. The dominant solutions are  $u(t) = Ct^{(c+1)/2} J_{c/2-1/2}(\sqrt{at})$ ,  $w(t) = Dt^{(c+1)/2} J_{c-1}(2\sqrt{bt})$  for some constants  $C, D$ . Note that both are  $\sim t^c$  for small  $t$ .

There is a surprisingly perfect match of the *total* number of infections for *Covid-19* during the initial and middle stages with our  $u(t)$ , from the moment when these numbers begin to grow "significantly" and during some time after the "turning point". In the USA and UK, at least from March 15 till April 15 at least. Epidemics are very stochastic processes, so such a precision is unexpected. If not  $u(t)$ , then presumably  $w(t)$  can be employed for the later stages.

Let us mention that <https://ourworldindata.org/coronavirus> is mostly used for the data, updated at 11:30 London time. *We always set  $x = \text{days}/10$  in this article.*

**The USA data.** The scaling coefficient 1.7 in Figure 2 is adjusted to match the real numbers. For the USA, we set  $y = \text{infections}/100K$ , and take March 17 the beginning of the period of "significant growth". The parameters are  $c = 2.2$ ,  $a = 0.2$ .

The *red dots* show the corresponding actual *total* numbers of infections. They *perfectly* match  $u(t) = 1.7t^{1.1}J_{0.6}(t\sqrt{0.2})$  in Figure 2, which results in the following: the number of cases in the USA was expected to reach its preliminary saturation at  $t_{top} = 4.85$  (48.5 days from 03/17 to May 5) with  $u_{top} = 10.3482$ , i.e. with 1034820 infections (it was 609516 at 04/15). This is of course a *lower bound*: about 1M of total cases at the  $u$ -saturation point  $t_{top}$  near May 5.

The *black dots* show the test period, till May 5. The "expectation", a lower bound for the "saturation" to be exact, was based on the assumption that *the intensity of hard measures continues to be proportional to the total number of detected infections to date*. It was clearly the case for the *red dots*, but there were several significant jumps and even periods of significant growth during the test period (black dots). This could be due to new clusters of infections or diminishing the intensity of hard measures. Such fluctuations are not unusual and do not influence too much the match with  $u(t)$  if they readily trigger additional protection measures, which is not always the case. If  $u(t)$  (upon some shifts) seems not applicable at the later stages, as happened for the USA and UK,  $w(t)$  is supposed to be used according to [6].

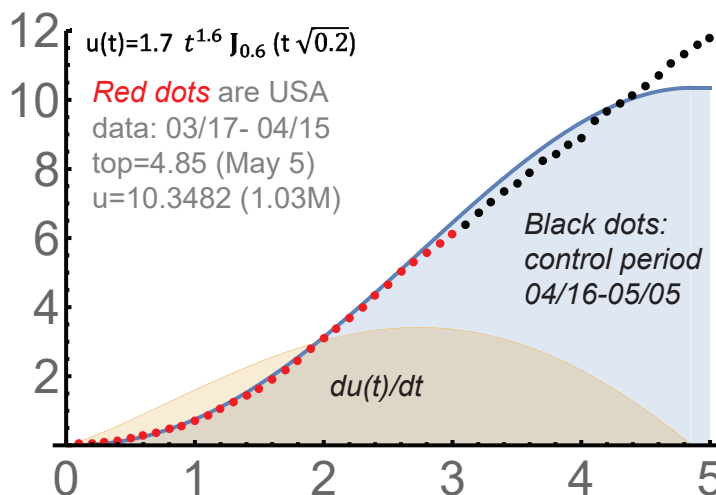

FIGURE 2.  $u(t) = 1.7 t^{(c+1)/2} J_{(c-1)/2}(\sqrt{at})$  for  $c = 2.2, a = 0.2$

Obviously  $t = t_{top}$  cannot be the end of the epidemic. The data from South Korea, the countries considered at the end, and those from other countries that went through the "saturation", demonstrate that a linear growth of the total number of cases can be expected around and after  $t_{top}$ . More exactly, it is proportional to  $t^{c/2} \cos(d \log(t))$ ; see below.

The obvious reasons are: (a) reducing the "hard" and "soft" measures, (b) no country is isolated from infections from other places, (c) continued testing can result in finding more asymptomatic cases, (d) new clusters of disease are always possible. Anyway, the  $u$ -formula is mostly applicable to the period when the protection measures, especially "hard" ones, are applied in a hard and regular manner.

Covid-19 in UK. The data will be from 03/16 till 04/15; add 18 to our "red dots", the initial number at 03/16, to match the actual total numbers. The *black dots* constitute the control period: 04/16-05/05.

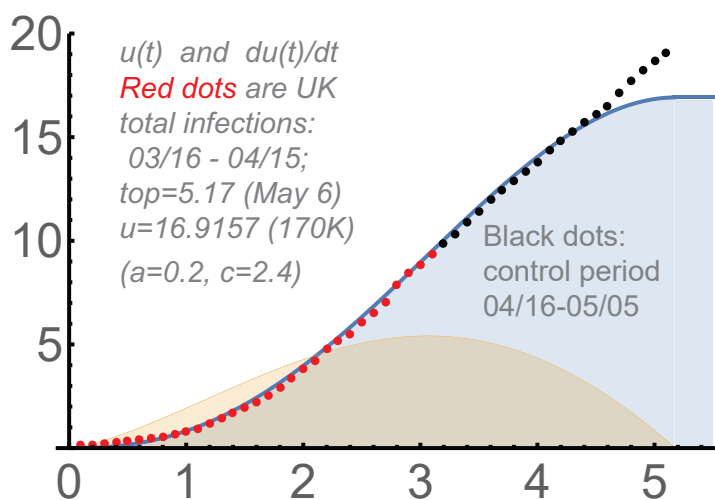

FIGURE 3.  $u(t) = 2.2 t^{(c+1)/2} J_{(c-1)/2}(\sqrt{at})$  for  $c = 2.4, a = 0.2$

Now  $c = 2.4, a = 0.2$  work fine, and the scaling coefficient is 2.2. The total number of cases is divided by  $10K$ , not by  $100K$  as for the USA. The " $u$ -saturation moment" was 5.17, i.e. about 51 days after March 16, somewhere around May 6. The estimate for corresponding number of infections was about 170000, with all ifs. It was assuming that the "hard" measures would be employed at the same pace as before April 15, i.e. following mode (A), which is the most aggressive approach.

Sweden 03/07-04/23. This is an example of the country that remains essentially "open". Actually, they actively do testing of infected people, the key "hard" measure from our perspective. Also, the strength of the health-care in this country must be taken into consideration, and that Sweden is surrounded by the countries that fight *Covid-17* aggressively. The growth of the total number of cases was essentially quadratic for a relatively long period, which is what "power law" states for the epidemics with minimal "intervention". By now, the growth is

linear; a reduction from  $t^c$  to  $t^{c/2}$  follows from the theory. Mathematically, our  $u$ -formula is applicable, but for the record low  $a = 0.1$ ; it is  $a = 0.15$  for "the world". Here  $y$  is the total number of cases divided by 1000; add 137, the initial value, to our "dots". The projected  $u$ -saturation was around May 17, with standard reservations; see Figure 4. We think  $w(t)$  can do better, but with the countries that do not employ real hard measures, the usage of  $u, w$  is questionable.

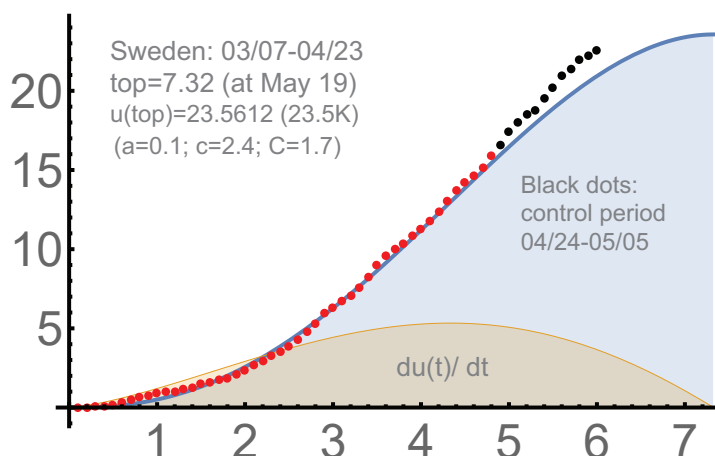

FIGURE 4.  $u(t) = 1.7 t^{(c+1)/2} J_{(c-1)/2}(\sqrt{at})$  for  $c = 2.4, a = 0.1$

Israel: "saturation". The last example we provide is what can be expected when the country went through the "saturation". Israeli population is diverse, which has a potential of significant fluctuations of the number of cases and various clusters of infection. However its solid response to *Covid-19* and good overall health-system, made the growth of the spread sufficiently predictable. We divide the total number of cases by 1000, as for Sweden; see Figure 5.

The *red dots* began March 13, when the *total* number of detected infections was 96, and stopped April 17; the remaining period till May 5, shown by the black dots, was the "control one". The saturation forecast went through almost perfectly, but there were significant fluctuations in process. After April 26, the predicted moment of the saturation, the growth of the total number of (known) infections is supposed to be mild linear. The parameters are:  $a = 0.3$ , i.e. the intensity of hard measures is better than with the USA, UK, and  $c = 2.6$ . The latter means that the initial transmission coefficient was somewhat worse than  $c = 2.4$  in the USA, UK, possibly due to the greater number of "normal" contacts. Recall that  $a, c$  are parameters of our theory, related to but not immediately connected with the real factors.

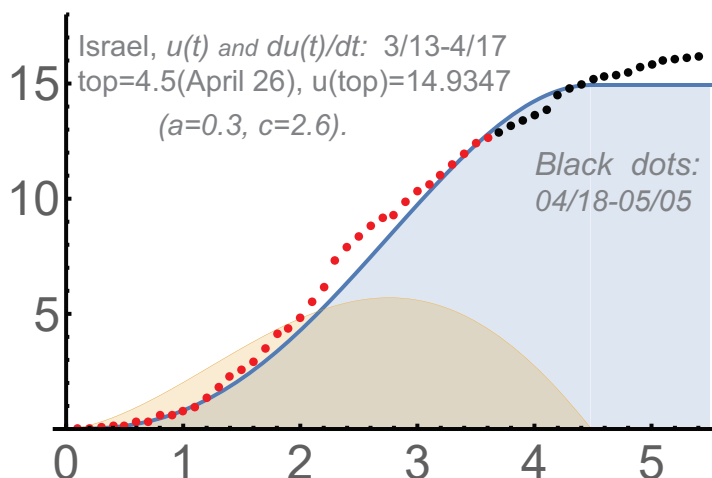

FIGURE 5.  $u(t) = 2.2 t^{(c+1)/2} J_{(c-1)/2}(\sqrt{at})$  for  $c = 2.6, a = 0.3$

**4. Forecasting cones.** Our function  $u(t)$  models well the period of intensive growth when the hard measures are coupled with the most aggressive respond to the current number of total cases. It seems essentially sufficient for forecasting if the (A)-mode is used all the way until the number of new detected infections drop almost to zero. Then  $t_{top}$ , the first zero of  $du(t)/dt$  is a reasonable estimate for the "technical end of epidemics". South Korea, Austria, Israel and quite a few others did exactly this. Some linear growth can be expected after  $t_{top}$ , but this moment is really a saturation.

However growing number of countries begin reducing hard measures (if any) almost after the turning point, or after what looks like a turning point. The growth can be expected linear then, but the number of daily new infections can be very high. From our perspective, this means a switch from mode (A) to mode (B). We need to be more exact here. The hard measures are still obviously present, but the response becomes softer, of type B.

For instance, if the number of new cases is essentially a constant, even uncomfortably high, the (B)-response is to keep the testing-detection constant too. Furthermore, counting on the improvements with testing and better capacities for isolation and treatment, many places with potentially high risks of the spread of *Covid-19* can be allowed to reopen. An argument in favor of such an approach is that people who suspect that they are infected begin more actively request help at this stage. This works in the same direction as any "hard" measures; some countries, like Sweden, count on this.

Possibly no further modeling is needed for the countries that reached stable relatively small numbers of new daily infections. This is with

usual reservations concerning new clusters of infections and similar developments. However if the new daily cases are constant but high, a different kind of modeling is required, which is  $(AB)$ .

Our theory provides this. The assumption is that the hard measures are still in place, but the response to the current total number of detected infections is via  $U(t)/t$  instead of  $U(t)$ ; see Section 2. The saturation will occur significantly later.

This model, called  $(AB)$ -mode here and in [6], is governed by  $w(t)$ . The point  $t_{top}^w$  where the (first) maximum of  $w(t)$  occurs seems a reasonable upper bound for the "technical saturation". The prior  $t_{top}^u = t_{top}$  then is a lower bound; we obtain some *forecast cone*.

Actually even relatively minor deviations with  $a, c$  can lead to significant changes of  $u(t)$  over time, so we have some "cones". However, we have something more fundamental here. The switch to  $w(t)$  is due to a different kind of management.

When the daily numbers of new cases are high, there are significant chances of new clusters and fluctuations of the data of all kinds. So we need to model a process with many uncertainties. However, we think that this is basically no different from what we did for the middle stages, where  $u(t)$  was surprisingly efficient.

Recall that  $u(t) = Ct^{\frac{c+1}{2}} J_{(c-1)/2}(t\sqrt{a})$ ,  $w(t) = Dt^{\frac{c+1}{2}} J_{c-1}(2\sqrt{tb})$ .

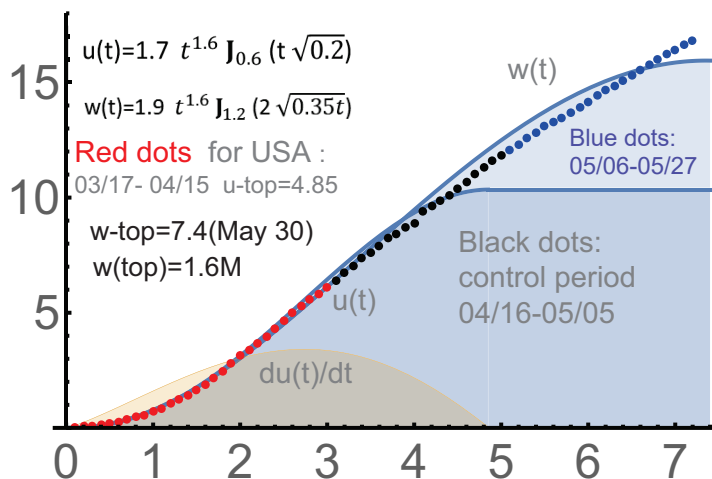

FIGURE 6. USA:  $c=2.2, a=0.2, C=1.7; b=0.35, D=1.9$ .

The cone for the USA. The prior  $t_{top} = t_{top}^u$  for  $u(t)$  was May 5, with  $a, c, C$  calculated on the bases of the data till April 16. It was under the expectations that the "hard" measures would applied as in  $(A)$  (as before April 16). However the presence of 3 major spikes in the daily



cases and other factors like *de facto* relaxing hard measures obviously delayed the saturation.

Whatever the reasons, the switch to the  $(AB)$ -mode and  $w(t)$  was a natural adjustment. However, it appeared insufficient for the USA. We provide the *blue dots*, obtained after the forecast cone was determined. For Sweden, the cone was not expected to work, but the dots for the USA appeared following a similar "Sweden pattern".

The cone is defined as the area between  $u(t)$  extended by a constant  $u(t_{top})$  for  $t > t_{top}^u$  and the graph of  $w(t)$  till  $t_{top}^w$ , which is approximately May 30, 2020. The parameters  $b, D$  of  $w(t)$  are calculated to ensure good match with *red dots*;  $c$ , the initial transmission rate, is the same for  $u(t)$  and  $w(t)$ . The graphs of  $u(t)$  and  $w(t)$  are very close to each other in the range of *red dots*. The above relation for  $C/D$  holds with the accuracy about 20%.

We mostly monitor the *trend*, the "derivative" of the graph of black dots, which is supposed to be close to the derivative of  $w(t)$  or  $u(t)$ . See Figure 6. Some spikes with number of cases are inevitable; it is acceptable if the dots continue to be parallel to  $u(t)$  or  $w(t)$  (or in between).

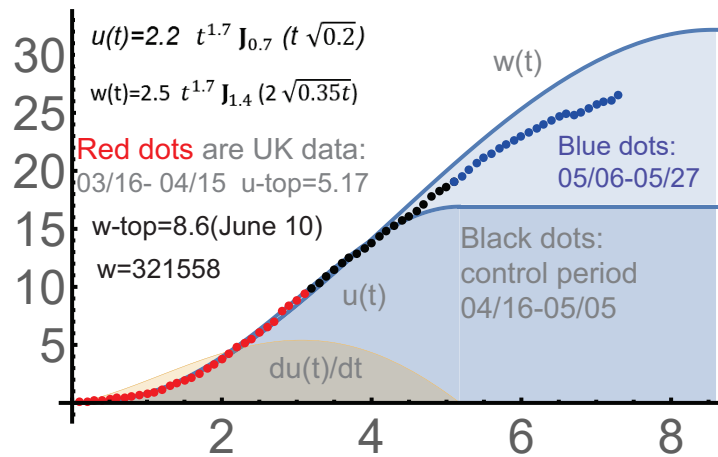

FIGURE 7. UK:  $c=2.4, a=0.2, C=2.2; b=0.35, D=2.5$ .

UK: June 10? The graphs of  $u(t), w(t)$  with all red-black-blue dots available by now are in Figure 7. The expected  $t_{top}^w$  is around June 9. The total number of detected infections is expected 330K. These "predictions" will of course depend on many developments. However, there is an important argument in favor of the stability of our model: any spikes with the numbers of infections are supposed to trigger actions of

authorities in charge and influence of own protection measures. This is a rationale for relatively uniform patterns of the spread of *Covid-19*.

**Sweden: anti-forecast.** The total number of infections in Sweden was actually not supposed to follow our  $u, w$ -curves, because this country does not follow hard ways with fighting *Covid-19*. Though Figure 8 is instructional.

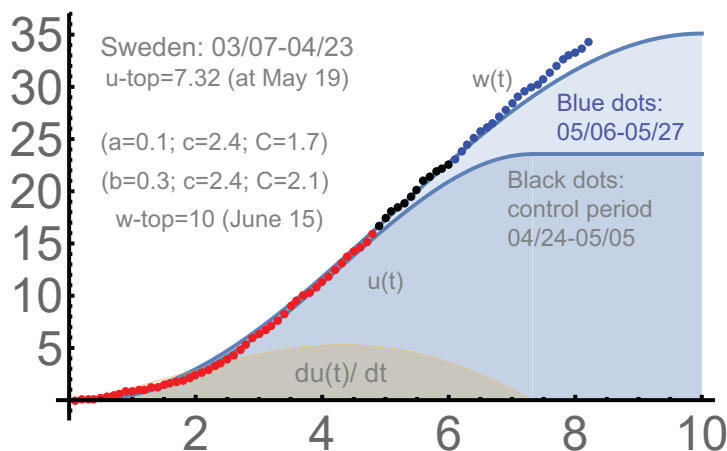

FIGURE 8.  $w(t) = 2.1t^{(c+1)/2} J_{c-1}(2\sqrt{bt})$ ;  $b=0.3, c=2.4$ .

**5. Two-phase solution.** Let us provide a *two-phase* model for the number of total infections: from the beginning of the intensive growth through the saturation  $t_{top}$  of the (A)-phase and till the "final saturation" of the (B)-phase. It works surprisingly well for the countries that reached reasonably small numbers of new daily infections during the first phase, what we call "technical saturation", so the (AB)-mode is mostly unnecessary for them.

The corresponding solution for phase 2 is in Section 6 from [6]. It is

$$u_B(t) = C_B t^{c/2} \cos(d \log(\text{Max}(1, t))),$$

where  $c$  must be the one we used in  $u(t) = C t^{(c+1)/2} J_{(c-1)/2}(\sqrt{at})$ , We determined the parameters  $a, c, d$ , and the scaling coefficients  $C, C_B$ , using the whole period till May 22 (2020), unless for Israel, where  $a, c, C$  were found in the middle of April.

Here  $\text{Max}(1, t)$  is to avoid some ambiguity at  $t = 0$ ; and we use  $u_B$  anyway for  $t > 1$ . Importantly, we start  $u_B$  at  $t = 0$ , not at some intermediate point. Practically, this means that we fine type (B) formula that provide the correct saturation point  $t_{top}$  and the rest of the

curve. Thus, some sharp usage of "soft" measures can be mathematically sufficient to end the epidemic, but  $d$  can be determined only in the vicinity of  $t_{top}$ , if it is reached.

The epidemic is of course far from over, but the first cycle hopefully approaches the end in these countries; so no test periods, "black dots", seem necessary. Recall that the parameters  $a, c, C$  for the first phase are mostly obtained on the basis of the period before or around the "turning points"; the same  $c$ , the initial transmission coefficient, is supposed to be used for both, (A) and (B), according to our theory.

Israel: 03/13-05/22. Here  $c = 2.6, a = 0.3, d = 0.6$ . The scaling coefficients are  $C = 2.2, C_B = 3.4$ . So  $u(t) = 2.2 t^{1.8} J_{0.8}(t\sqrt{0.3})$ .

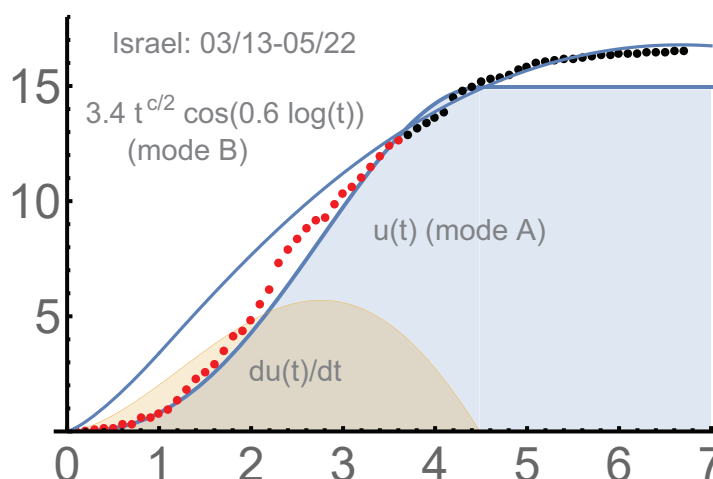

FIGURE 9. Israel:  $c=2.6, a=0.3, d=0.6$

Italy: 2/22-5/22. See Figure 10. The starting point is 2/12, when the total number of infections was 17; in this paper, we always subtract this initial value when calculating our *dots*. One has:

$$u_{1,2}(t) = 0.8 t^{(c+1)/2} J_{\pm \frac{c-1}{2}}(\sqrt{at}), \quad u(t) = u_1(t) - u_2(t), \quad \text{and}$$

$$u_B(t) = 2.85 t^{c/2} \cos(d \log(\text{Max}(1, t))), \quad c=2.6, a=0.2, d=0.5.$$

Here we use the second, non-dominant, solution  $u_2$  of our equation. For  $t \approx 0$ , it is approximately  $\sim t$ , i.e. smaller than  $\sim t^c$  for the dominating solution  $u_1$ , and the  $\max u_2(t)$  occurs significantly earlier. This maximum is the reason for a well-visible bent in the middle of the sequence of red dots. Actually, we can see some kind of the bent for Israel too, but it was short-lived and did not prevent us from using  $u_1$  only. The coefficient of  $u_2$  is not always  $-1$ .

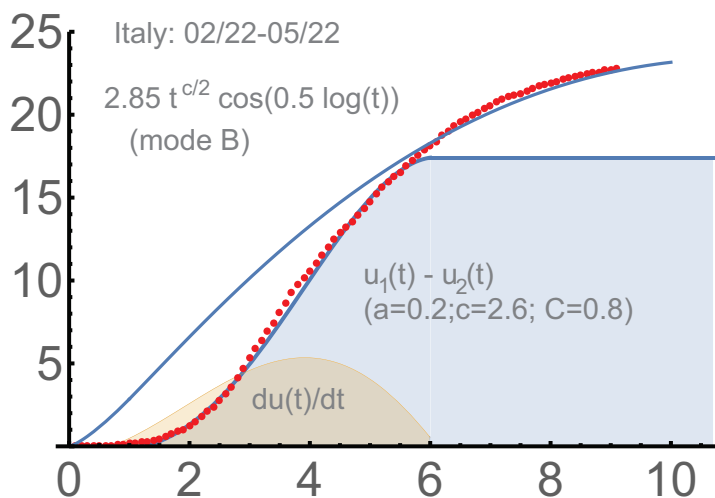

FIGURE 10. Italy:  $c=2.6, a=0.2, d=0.5$

Germany: 3/07-5/22. See Figure 11. We begin here with the initial number of total infections 684, which must be subtracted when calculating the *red dots*. This is the moment when the curve began to look stable, i.e. a systematic management began. One has:

$$u_{1,2}(t) = 1.3 t^{(c+1)/2} J_{\pm \frac{c-1}{2}}(\sqrt{at}), \quad u(t) = u_1(t) - 0.7u_2(t), \quad \text{and}$$

$$u_B(t) = 2.95 t^{c/2} \cos(d \log(\text{Max}(1, t))), \quad c=2.6, a=0.35, d=0.56.$$

Japan: 3/20- 5/22. See Figure 12. It was a sort of the second wave in Japan, with already 950 total infections on March 20. The curve is discontinuous, but manageable by our *2-phase solution*:

$$u_{1,2}(t) = 1.5 t^{(c+1)/2} J_{\pm \frac{c-1}{2}}(\sqrt{at}), \quad u(t) = u_1(t) - 0.4u_2(t), \quad \text{and}$$

$$u_B(t) = 3.15 t^{c/2} \cos(d \log(\text{Max}(1, t))), \quad c=2.6, a=0.3, d=0.6.$$

The Netherlands: 03/13-5/22. Figure 13. The response to *Covid-19* was relatively late in the Netherlands; the number of the total case was 383 on 3/13, the beginning of intensive spread from our perspective. However, the country perfectly reached the saturation at  $t_{top}$  with a single  $u(t) = u_1(t)$ , and then smoothly switched to *phase 2*:

$$u(t) = 0.5 t^{(c+1)/2} J_{\frac{c-1}{2}}(\sqrt{at}), \quad c=2.4, a=0.2,$$

$$u_B(t) = 0.86 t^{c/2} \cos(d \log(\text{Max}(1, t))), \quad d=0.54.$$

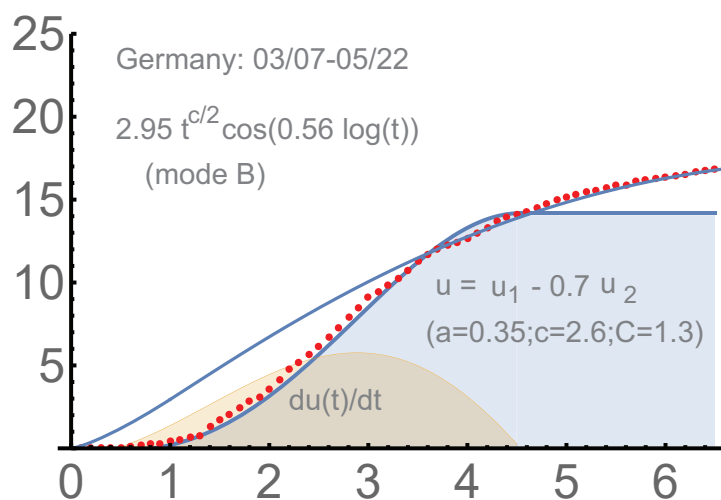

FIGURE 11. Germany:  $c=2.6$ ,  $a=0.35$ ,  $d=0.56$

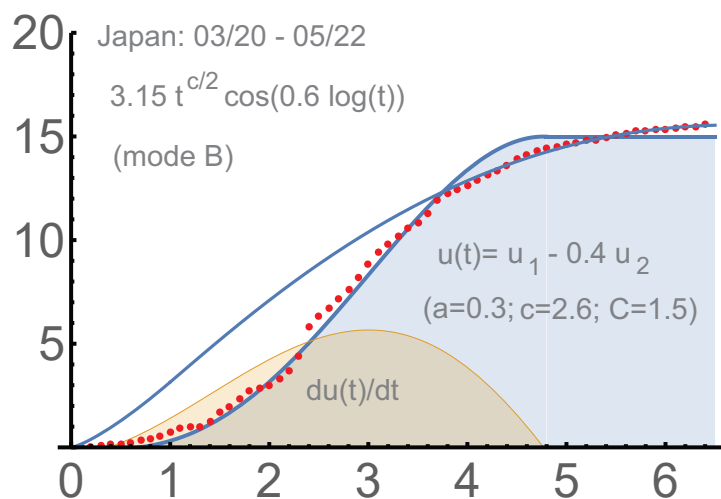

FIGURE 12. Japan:  $u = 1.5t^{1.8}(J_{0.8} - 0.4J_{-0.8})(t\sqrt{0.3})$ .

To finalize, the best ways to use our curves seem as follows:

- (1): determine  $a, c, C$  when the spread looks essentially linear;
- (2): update them constantly till the turning point and beyond;
- (3): expect the "bents" to appear and add the  $u^2(t)$  if needed;
- (4): try to adjust the intensity of the measures to match  $u(t)$ ;
- (5): at the turning point, determine  $b, D$  and the bound  $w(t)$ ;
- (6): after the saturation at  $t_{top}$ , find  $d$  and switch to *phase 2*,

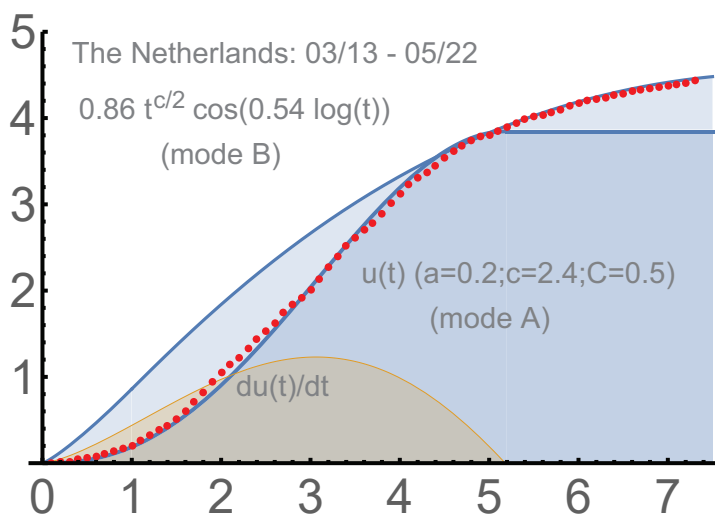

FIGURE 13. The Netherlands:  $u = 0.5t^{1.7} J_{0.7}(t\sqrt{0.2})$ .

(7): "detection - isolation" must be continued after saturation.

**6. Automated forecasting.** Generally, our *two-phase solution* can be served the best as a forecasting tool if the data and the measures are as uniform and "stable" as possible. Then underreporting the number of infections, focusing on symptomatic cases, and inevitable fluctuations with the data may not influence too much the applicability of the  $u, w$ -curves and  $u_B$ .

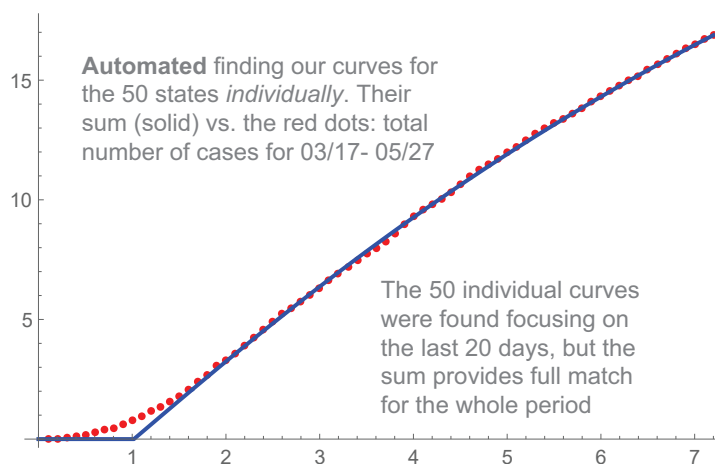

FIGURE 14. USA, the total of the curves for individual states.



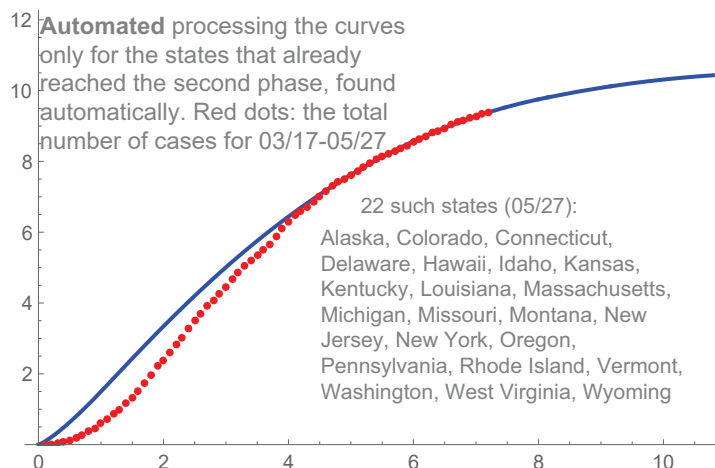

FIGURE 15. Only for the states reached 2nd stage on 05/27.

Let us show how our fully automated program works, which automatically finds, the corresponding curve determine the phase, and provide the current forecast, which can be "linear" if the country/area has not reach the second phase. The main challenge among the countries considered above was the USA. Here it is necessary to obtain the forecasts *automatically* for 50 states and consider then the total sum of the resulting curves.

The period was taken 03/17-05/27 for all states. We use the data from <https://github.com/nytimes/covid-19-data>. Our program naturally focuses on the later stages, especially the last 20 days; however, the match with the total number of detected infections almost from 03/17 appeared perfect; Figure 14 Each and every state was processed individually. The *red dots* are the total numbers of detected cases, as above.

The states that reached the 2nd phase were automatically determined; Figure 15 provides the sum of these curves extended till 07/07 only for these states. The total number of infections is  $y * 100K$ ;  $x = \text{days}/10$ . The states are Alaska, Colorado, Connecticut, Delaware, Hawaii, Idaho, Kansas, Kentucky, Louisiana, Massachusetts, Michigan, Missouri, Montana, New Jersey, New York, Oregon, Pennsylvania, Rhode Island, Vermont, Washington, West Virginia, Wyoming as for 05/28. Obviously the situation with these and other states is fluid, and any forecasts can be only conditional. The end of this graph,  $x = 11$ , corresponds to day 110 from March 17, about July 7. Let us note that by allowing our curves in the 22 states reached phase 2 to go through their saturation and then *diminish*, we obtain that the epidemics may reach the saturation in the whole USA about August 25. This makes

sense, since any states (and countries) benefit from the improvements with the epidemic in their neighbors. We omit the corresponding curve.

Our program was tested for *automated modeling and forecasting* with many countries. The author considers making the code publicly available. The possibility of fully automated processing the data is a clear confirmation of the potential of our *2-phase solution*. At least, this completely addresses concerns, quite common for the programs used for forecasting (stock markets included), that the corresponding machinery cannot be fully formalized.

We did our best to provide ample test periods, and will continue to do this. There are of course many new factors that can emerge. With the USA, it will take some time to evaluate the impact of opening the country, and there are quite a few states that are still in phase one. However as far as the policies of those in charge and our own way to react are sufficiently stable, forecasting seems doable.

**Acknowledgements.** I'd like to thank ETH-ITS for outstanding hospitality. My special thanks are to Giovanni Felder, Rahul Pandharipande. I also thank very much David Kazhdan for his valuable comments and suggestions. Funding: partially supported by NSF grant DMS-1901796 and the Simons Foundation.

#### References.

- [1] H. Hethcote, *The mathematics of infectious diseases*, SIAM Review, 42:4 (2000), 599–653. [2](#), [7](#)
- [2] H. Hethcote, and S. Levin, *Periodicity in Epidemiological Models*, In: Applied Mathematical Ecology. Biomathematics, 18, 193–211, Springer, Berlin, Heidelberg, S. Levin, T. Hallam, L. Gross (eds), 1989. [2](#)
- [3] S. Meyer, and L. Held, *Power-Law models for infectious disease spread*, The Annals of Applied Statistics 8:3 (2014), 1612–1639. [2](#), [3](#)
- [4] Ph. Strong, *Epidemic psychology: a model*, Sociology of Health & Illness 12:3 (1990), 249–259. [2](#)
- [5] S. Cobey, *Modeling infectious disease dynamics*, Science, 24 Apr 2020; DOI: 10.1126/science.abb5659. [2](#)
- [6] I. Cherednik, *Momentum managing epidemic spread and Bessel functions*, Preprint: arxiv 2004.06021v3 (q-bio), 2020. [3](#), [4](#), [7](#), [8](#), [10](#), [14](#), [16](#)
- [7] I. Cherednik, *Artificial intelligence approach to momentum risk-taking*, Preprint: arxiv 1911.08448v4 (q-fin), 2019. [3](#), [7](#)
- [8] R. Carrasco-Hernandez, and R. Jácome, and Y. López Vidal, and S. Ponce de León, *Are RNA viruses candidate agents for the next global pandemic? A review*, ILAR Journal, 58:3 (2017), 343–358. [8](#)
- [9] G.N. Watson, *A Treatise on the Theory of Bessel Functions*, 2nd Edition, Cambridge University Press, Cambridge, 1944. [9](#)
